# Supplementary material for: Trastuzumab Deruxtecan in HER2-Positive Metastatic Breast Cancer Patients with Brain Metastases: A DESTINY-Breast01 Subgroup Analysis
Source: PubMed Central journal article supplement — Cancer Discov. 2022 Oct 18;12(12):2754–62. doi: 10.1158/2159-8290.CD-22-0837 (PMC9716244; doi:10.1158/2159-8290.cd-22-0837), 2022-10-18
Supplement: cd-22-0837_supp1.pdf [file cd-22-0837_supp1.pdf]

## Supplementary Data

**Supplementary Table S1.** Patient baseline characteristics

| <b>Demographic variable</b>             | <b>BM subgroup<br/>(n = 24)</b> | <b>Non-BM<br/>subgroup<br/>(n = 160)</b> | <b>All patients<br/>(N = 184)</b> |
|-----------------------------------------|---------------------------------|------------------------------------------|-----------------------------------|
| Age, median (range), years <sup>a</sup> | 58.0 (33.0-<br>85.0)            | 55.0 (28.0-<br>96.0)                     | 55.0 (28.0-<br>96.0)              |
| ≥65 years, n (%)                        | 9 (37.5)                        | 35 (21.9)                                | 44 (23.9)                         |
| Female, n (%)                           | 24 (100)                        | 160 (100)                                | 184 (100)                         |
| Race, n (%)                             |                                 |                                          |                                   |
| Asian                                   | 9 (37.5)                        | 61 (38.1)                                | 70 (38.0)                         |
| White                                   | 13 (54.2)                       | 88 (55.0)                                | 101 (54.9)                        |
| Other                                   | 1 (4.2)                         | 2 (1.3)                                  | 3(1.6)                            |
| Missing                                 | 1 (4.2)                         | 3 (1.9)                                  | 4 (2.2)                           |
| Region, n (%)                           |                                 |                                          |                                   |
| Europe                                  | 9 (37.5)                        | 59 (36.9)                                | 68 (37.0)                         |
| Asia                                    | 9 (37.5)                        | 54 (33.8)                                | 63 (34.2)                         |
| North America                           | 6 (25.0)                        | 47 (29.4)                                | 53 (28.8)                         |
| ECOG performance status, n (%)          |                                 |                                          |                                   |
| 0                                       | 15 (62.5)                       | 87 (54.4)                                | 102 (55.4)                        |
| 1                                       | 9 (37.5)                        | 72 (45.0)                                | 81 (44.0)                         |
| 2                                       | 0                               | 1 (0.6)                                  | 1 (0.5)                           |

| <b>Demographic variable</b>                                               | <b>BM subgroup<br/>(n = 24)</b> | <b>Non-BM<br/>subgroup<br/>(n = 160)</b> | <b>All patients<br/>(N = 184)</b> |
|---------------------------------------------------------------------------|---------------------------------|------------------------------------------|-----------------------------------|
| Hormone receptor status, <i>n</i> (%)                                     |                                 |                                          |                                   |
| Positive                                                                  | 9 (37.5)                        | 88 (55.0)                                | 97 (52.7)                         |
| Negative                                                                  | 14 (58.3)                       | 69 (43.1)                                | 83 (45.1)                         |
| Unknown                                                                   | 1 (4.2)                         | 3 (1.9)                                  | 4 (2.2)                           |
| HER2 expression, <i>n</i> (%) <sup>b</sup>                                |                                 |                                          |                                   |
| IHC3+                                                                     | 19 (79.2)                       | 135 (84.4)                               | 154 (83.7)                        |
| IHC1+ or 2+, ISH+                                                         | 5 (20.8)                        | 23 (14.4)                                | 28 (15.2)                         |
| Missing data                                                              | 0                               | 2 (1.3)                                  | 2 (1.1)                           |
| Sum of diameters of target lesions,<br>median (range), cm                 | 6.4 (1.2-15.1)                  | 5.4 (1.4-<br>24.5)                       | 5.5 (1.2-24.5)                    |
| No. of prior cancer regimens in the<br>metastatic setting, median (range) | 6 (3-16)                        | 6 (2-27)                                 | 6 (2-27)                          |
| Prior cancer systemic therapy, <i>n</i> (%)                               |                                 |                                          |                                   |
| Trastuzumab                                                               | 24 (100)                        | 160 (100)                                | 184 (100)                         |
| T-DM1 <sup>c</sup>                                                        | 24 (100)                        | 160 (100)                                | 184 (100)                         |
| Pertuzumab                                                                | 15 (62.5)                       | 106 (66.3)                               | 121 (65.8)                        |
| Other anti-HER2 therapies                                                 | 15 (62.5)                       | 85 (53.1)                                | 100 (54.3)                        |
| HER2 TKI                                                                  | 15 (62.5)                       | 78 (48.8)                                | 93 (50.5)                         |
| Hormone therapy                                                           | 11 (45.8)                       | 79 (49.4)                                | 90 (48.9)                         |
| Other systemic therapy                                                    | 24 (100)                        | 159 (99.4)                               | 183 (99.5)                        |

| <b>Demographic variable</b>                          | <b>BM subgroup<br/>(n = 24)</b> | <b>Non-BM<br/>subgroup<br/>(n = 160)</b> | <b>All patients<br/>(N = 184)</b> |
|------------------------------------------------------|---------------------------------|------------------------------------------|-----------------------------------|
| Radiation therapy (any location)                     | 20 (83.3)                       | 110 (68.8)                               | 130 (70.7)                        |
| Best response to T-DM1 therapy, <i>n</i><br>(%)      |                                 |                                          |                                   |
| Complete response/partial<br>response/stable disease | 10 (41.7)                       | 69 (43.1)                                | 79 (42.9)                         |
| Progressive disease                                  | 10 (41.7)                       | 56 (35.0)                                | 66 (35.9)                         |
| Not evaluable                                        | 4 (16.7)                        | 35 (21.9)                                | 39 (21.2)                         |
| Presence of visceral disease, <i>n</i> (%)           | 24 (100)                        | 145 (90.6)                               | 169 (91.8)                        |
| Prior CNS treatment, <i>n</i> (%) <sup>d</sup>       |                                 |                                          |                                   |
| Radiotherapy only                                    | 14 (58.3)                       | —                                        | —                                 |
| Surgery only                                         | 1 (4.2)                         | —                                        | —                                 |
| Radiotherapy plus surgery                            | 3 (12.5)                        | —                                        | —                                 |
| Radiotherapy plus surgery plus<br>capecitabine       | 1 (4.2)                         | —                                        | —                                 |
| None reported                                        | 5 (20.8)                        | —                                        | —                                 |

BM, brain metastasis; CNS, central nervous system; ECOG, Eastern Cooperative Oncology Group; HER2, human epidermal growth factor receptor 2; IHC, immunohistochemistry; ISH, in situ hybridization; T-DM1, trastuzumab emtansine; T-DXd, trastuzumab deruxtecan; TKI, tyrosine kinase inhibitor.

<sup>a</sup>Median age at informed consent.

<sup>b</sup>HER2 expression was centrally confirmed prospectively on the most recent archival tissue using the American Society of Clinical Oncology/College of American Pathologists guidelines<sup>1</sup>

<sup>c</sup>56 patients (30.4%) in the overall patient population received T-DXd immediately after their initial T-DM1 therapy, 7 of whom were in the BM subgroup.

<sup>d</sup>Radiotherapy includes whole-brain radiotherapy, brain-directed stereotactic radiotherapy, and brain-directed radiosurgery. Surgery includes any brain-directed surgery (ie, craniotomy, metastasectomy in brain, and resection or removal of brain lesion).

### **References**

1. Lin L, Sirohi D, Coleman JF, Gulbahce HE. American Society of Clinical Oncology/College of American Pathologists 2018 Focused Update of Breast Cancer HER2 FISH Testing Guidelines—Results From a National Reference Laboratory. *Am J Clin Pathol* 2019;152(4):479-85.

**Supplementary Table S2. Sites of progression**

| <b>Site of PD</b>                                | <b>BM<br/>subgroup<sup>a</sup><br/>(n = 24)</b> | <b>Non-BM<br/>subgroup<br/>(n = 160)</b> | <b>All<br/>patients<br/>(N = 184)</b> |
|--------------------------------------------------|-------------------------------------------------|------------------------------------------|---------------------------------------|
| Patients with progression on study, <i>n</i> (%) | 8 (33.3)                                        | 40 (25.0)                                | 48 (26.1)                             |
| Lung                                             | 3 (12.5)                                        | 17 (10.6)                                | 20 (10.9)                             |
| Liver                                            | 2 (8.3)                                         | 12 (7.5)                                 | 14 (7.6)                              |
| Brain                                            | 2 (8.3)                                         | 2 (1.3)                                  | 4 (2.2)                               |
| Bone                                             | 1 (4.2)                                         | 2 (1.3)                                  | 3 (1.6)                               |
| Lymph node                                       | 1 (4.2)                                         | 11 (6.9)                                 | 12 (6.5)                              |
| Pleura                                           | 1 (4.2)                                         | 1 (0.6)                                  | 2 (1.1)                               |
| Soft tissue                                      | 1 (4.2)                                         | 0                                        | 1 (0.5)                               |
| Chest wall                                       | 0                                               | 4 (2.5)                                  | 4 (2.2)                               |
| Muscle                                           | 0                                               | 1 (0.6)                                  | 1 (0.5)                               |
| Peritoneum                                       | 0                                               | 1 (0.6)                                  | 1 (0.5)                               |

<sup>a</sup>Computed tomography or magnetic resonance imaging scan of the brain was mandatory Q6W ( $\pm 7$  days).

**Supplementary Table S3.** Overall safety summary of T-DXd 5.4 mg/kg

| Type of adverse event, n (%) <sup>a</sup> | <b>BM<br/>subgroup<br/>(n = 24)</b> | <b>Non-BM<br/>patients<br/>(n = 160)</b> | <b>All<br/>patients<br/>(N = 184)</b> |
|-------------------------------------------|-------------------------------------|------------------------------------------|---------------------------------------|
| Any TEAE                                  | 24 (100)                            | 159 (99.4)                               | 183 (99.5)                            |
| Drug-related                              | 24 (100)                            | 159 (99.4)                               | 183 (99.5)                            |
| TEAE ≥ grade 3                            | 13 (54.2)                           | 92 (57.5)                                | 105 (57.1)                            |
| Drug-related                              | 10 (41.7)                           | 79 (49.4)                                | 89 (48.4)                             |
| Serious TEAE                              | 3 (12.5)                            | 39 (24.4)                                | 42 (22.8)                             |
| Drug-related                              | 1 (4.2)                             | 22 (13.8)                                | 23 (12.5)                             |
| TEAE associated with<br>discontinuation   | 2 (8.3)                             | 26 (16.3)                                | 28 (15.2)                             |
| Drug-related                              | 2 (8.3)                             | 25 (15.6)                                | 27 (14.7)                             |
| TEAE associated with dose<br>reduction    | 5 (20.8)                            | 38 (23.4)                                | 43 (23.4)                             |
| Drug-related                              | 4 (16.7)                            | 36 (22.5)                                | 40 (21.7)                             |
| TEAE associated with dose<br>interruption | 9 (37.5)                            | 56 (35.0)                                | 65 (35.3)                             |
| Drug-related                              | 8 (33.3)                            | 45 (28.1)                                | 53 (28.8)                             |
| TEAE associated with death <sup>b</sup>   | 2 (8.3)                             | 7 (4.4)                                  | 9 (4.9)                               |
| Drug-related                              | 1 (4.2)                             | 1 (0.6)                                  | 2 (1.1)                               |

BM, brain metastasis; T-DXd, trastuzumab deruxtecan; TEAE, treatment-emergent adverse event.

<sup>a</sup>Relationship to study drug was determined by the treating investigator.

<sup>b</sup>Each of the following TEAEs was associated with a fatal outcome: in the BM subgroup, respiratory failure and disease progression (each  $n = 1$ ); in the non-BM subgroup, acute respiratory failure, general physical health deterioration, lymphangitis, pneumonia, pneumonitis, and shock hemorrhagic (each  $n = 1$ ) and 1 patient had 2 TEAEs associated with death (acute kidney injury and acute hepatic failure).

**Supplementary Table S4.** Treatment-emergent adverse events in  $\geq 15\%$  of patients

| Preferred term, <sup>a</sup> n (%)            | BM subgroup (n = 24) |           | All patients (N = 184) |            |
|-----------------------------------------------|----------------------|-----------|------------------------|------------|
|                                               | Grade                |           | Grade                  |            |
|                                               | Any                  | $\geq 3$  | Any                    | $\geq 3$   |
| Any adverse event                             | 24 (100)             | 13 (54.2) | 183 (99.5)             | 105 (57.1) |
| Nausea                                        | 16 (66.7)            | 0         | 143 (77.7)             | 14 (7.6)   |
| Fatigue                                       | 14 (58.3)            | 3 (12.5)  | 91 (49.5)              | 11 (6.0)   |
| Alopecia                                      | 13 (54.2)            | 0         | 89 (48.4)              | 1 (0.5)    |
| Diarrhea                                      | 10 (41.7)            | 2 (8.3)   | 54 (29.3)              | 5 (2.7)    |
| Vomiting                                      | 10 (41.7)            | 1 (4.2)   | 84 (45.7)              | 8 (4.3)    |
| Decreased neutrophil count <sup>b</sup>       | 10 (41.7)            | 6 (25.0)  | 64 (34.8)              | 38 (20.7)  |
| Decreased white blood cell count <sup>c</sup> | 8 (33.3)             | 2 (8.3)   | 39 (21.2)              | 12 (6.5)   |
| Decreased appetite                            | 8 (33.3)             | 0         | 57 (31.0)              | 3 (1.6)    |
| Anemia <sup>d</sup>                           | 7 (29.2)             | 1 (4.2)   | 55 (29.9)              | 16 (8.7)   |
| Constipation                                  | 7 (29.2)             | 0         | 66 (35.9)              | 1 (0.5)    |
| Cough                                         | 6 (25.0)             | 0         | 35 (19.0)              | 0          |
| Stomatitis <sup>e</sup>                       | 6 (25.0)             | 1 (4.2)   | 27 (14.7)              | 2 (1.1)    |
| Decreased platelet count <sup>f</sup>         | 6 (25.0)             | 1 (4.2)   | 39 (21.2)              | 8 (4.3)    |
| Decreased lymphocyte count <sup>g</sup>       | 5 (20.8)             | 4 (16.7)  | 26 (14.1)              | 12 (6.5)   |
| Headache                                      | 5 (20.8)             |           | 36 (19.6)              | 0          |



|                                   |          |         |           |         |
|-----------------------------------|----------|---------|-----------|---------|
| Dizziness                         | 4 (16.7) | 0       | 17 (9.2)  | 0       |
| Dyspepsia                         | 4 (16.7) | 0       | 26 (14.1) | 0       |
| Prolonged ECG QT interval         | 4 (16.7) | 0       | 9 (4.9)   | 2 (1.1) |
| Hypokalemia                       | 4 (16.7) | 1 (4.2) | 21 (11.4) | 6 (3.3) |
| Mucosal inflammation              | 4 (16.7) | 0       | 13 (7.1)  | 0       |
| Upper respiratory tract infection | 4 (16.7) | 0       | 20 (10.9) | 0       |
| Weight decreased                  | 4 (16.7) | 0       | 14 (7.6)  | 0       |
| Abdominal pain <sup>h</sup>       | 3 (12.5) | 0       | 31 (16.8) | 2 (1.1) |

BM, brain metastasis; ECG, electrocardiogram; T-DXd, trastuzumab deruxtecan.

<sup>a</sup>As reported by the investigator for the safety analysis set (patients who received  $\geq 1$  dose of T-DXd 5.4 mg/kg).

<sup>b</sup>Includes preferred terms “neutrophil count decreased” and “neutropenia.”

<sup>c</sup>Includes preferred terms “white blood cell count decreased” and “leukopenia.”

<sup>d</sup>Includes preferred terms “hematocrit decreased,” “hemoglobin decreased,” “red blood cell count decreased,” and “anemia.”

<sup>e</sup>Includes preferred terms “stomatitis,” “aphthous ulcer,” “mouth ulceration,” “oral mucosa erosion,” “oral mucosal blistering.”

<sup>f</sup>Includes preferred terms “platelet count decreased” and “thrombocytopenia.”

<sup>g</sup>Includes preferred terms “lymphocyte count decreased” and “lymphopenia.”

<sup>h</sup>Includes preferred terms “abdominal discomfort,” “abdominal pain,” “abdominal pain lower,” and “abdominal pain upper.”
